# Supplementary material
Source: MDPI journal article supplement (https://www.mdpi.com/2311-7524/8/11/1065)
Supplement: s1 [file s1]

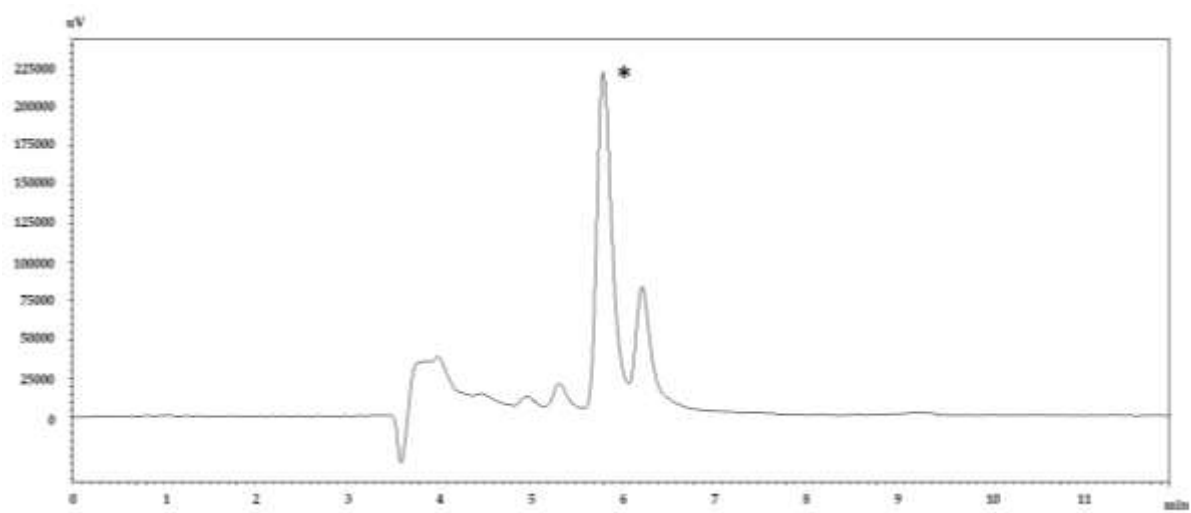

**Figure S1.** Chromatogram of sulforaphane standard (detected at 196 nm) used for analysis.

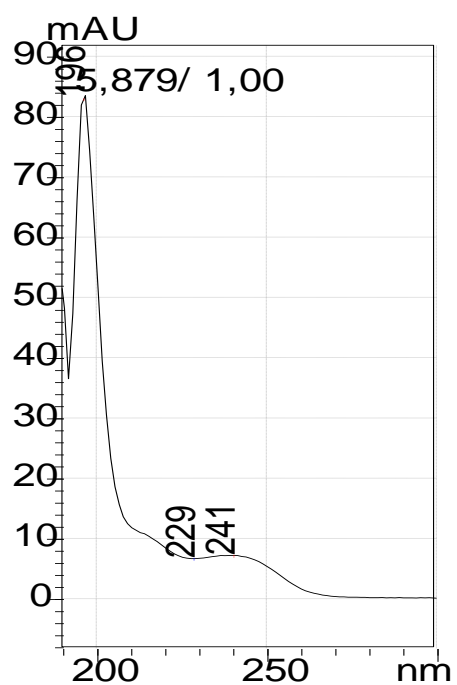

**Figure S2.** Spectrum of sulforaphane standard (detected at 196 nm) used for analysis.
